# Supplementary material for: Optimal Gating Window for Respiratory-Gated Radiotherapy with Real-Time Position Management and Respiration Guiding System for Liver Cancer Treatment
Source: PubMed Central journal article supplement (PMC6416406; doi:10.1038/s41598-019-40858-2), 2019-03-13
Supplement: 41598_2019_40858_MOESM1_ESM.pdf [file 41598_2019_40858_MOESM1_ESM.pdf]

# **Optimal Gating Window for Respiratory-Gated Radiotherapy with Real-Time Position Management and Respiration Guiding System for Liver Cancer Treatment**

Se An Oh<sup>1</sup>, Ji Woon Yea<sup>1,2</sup>, Sung Kyu Kim<sup>1,2</sup>, and Jae Won Park<sup>1,2\*</sup>

<sup>1</sup>Department of Radiation Oncology, Yeungnam University Medical Center, Daegu, Korea

<sup>2</sup>Department of Radiation Oncology, Yeungnam University College of Medicine, Daegu, Korea

\* Corresponding author:

E-mail: [kapicap@ynu.ac.kr](mailto:kapicap@ynu.ac.kr)

## Supplementary Table Legends

Supplementary Table S1. Results of paired *t*-test between unguided and guided respiration signals with RPM and respiration guiding system ( $n = 52$ ).

Supplementary Table S1.

| Patient | Respiration | Mean±SD (s) | Difference between paired data |             |                                          |
|---------|-------------|-------------|--------------------------------|-------------|------------------------------------------|
|         |             |             | Number of respiration signals  | Mean±SD (s) | <i>p</i> -value of paired <i>t</i> -test |
| P#1     | Free        | 4.483±0.936 | 26                             | 1.525±0.947 | <0.001*                                  |
|         | Guided      | 2.958±0.161 |                                |             |                                          |
| P#2     | Free        | 3.865±0.715 | 29                             | 0.606±1.095 | 0.006*                                   |
|         | Guided      | 3.259±0.836 |                                |             |                                          |
| P#3     | Free        | 4.674±0.404 | 24                             | 1.709±0.414 | <0.001*                                  |
|         | Guided      | 2.966±0.101 |                                |             |                                          |
| P#4     | Free        | 3.523±0.265 | 33                             | 0.558±0.316 | <0.001*                                  |
|         | Guided      | 2.964±0.159 |                                |             |                                          |
| P#5     | Free        | 6.732±2.770 | 17                             | 3.759±2.751 | <0.001*                                  |
|         | Guided      | 2.974±0.212 |                                |             |                                          |
| P#6     | Free        | 4.673±0.948 | 25                             | 1.475±1.236 | <0.001*                                  |
|         | Guided      | 3.198±0.958 |                                |             |                                          |
| P#7     | Free        | 5.018±0.989 | 23                             | 2.057±1.025 | <0.001*                                  |
|         | Guided      | 2.961±0.235 |                                |             |                                          |
| P#8     | Free        | 3.623±1.369 | 32                             | 0.656±1.372 | 0.011*                                   |
|         | Guided      | 2.967±0.197 |                                |             |                                          |
| P#9     | Free        | 3.730±0.480 | 31                             | 0.758±0.507 | <0.001*                                  |
|         | Guided      | 2.972±0.170 |                                |             |                                          |
| P#10    | Free        | 3.429±0.743 | 34                             | 0.463±0.770 | 0.001*                                   |
|         | Guided      | 2.966±0.257 |                                |             |                                          |

|      |        |             |    |             |         |
|------|--------|-------------|----|-------------|---------|
| P#11 | Free   | 5.574±1.258 | 20 | 2.447±1.474 | <0.001* |
|      | Guided | 3.126±0.449 |    |             |         |
| P#12 | Free   | 4.677±1.161 | 24 | 1.588±1.357 | <0.001* |
|      | Guided | 3.089±0.655 |    |             |         |
| P#13 | Free   | 5.043±0.756 | 23 | 2.073±0.737 | <0.001* |
|      | Guided | 2.970±0.225 |    |             |         |
| P#14 | Free   | 3.917±0.495 | 29 | 0.956±0.577 | <0.001* |
|      | Guided | 2.961±0.237 |    |             |         |
| P#15 | Free   | 3.359±0.380 | 34 | 0.382±0.403 | <0.001* |
|      | Guided | 2.978±0.163 |    |             |         |
| P#16 | Free   | 4.251±1.832 | 27 | 1.287±1.873 | 0.001*  |
|      | Guided | 2.965±0.257 |    |             |         |
| P#17 | Free   | 6.536±1.193 | 18 | 3.401±1.459 | <0.001* |
|      | Guided | 3.135±0.740 |    |             |         |
| P#18 | Free   | 3.925±0.669 | 30 | 3.401±1.459 | <0.001* |
|      | Guided | 2.959±0.325 |    |             |         |
| P#19 | Free   | 3.401±0.561 | 34 | 0.333±0.801 | 0.021*  |
|      | Guided | 3.069±0.545 |    |             |         |
| P#20 | Free   | 5.289±0.952 | 22 | 2.321±0.945 | <0.001* |
|      | Guided | 2.968±0.213 |    |             |         |
| P#21 | Free   | 3.264±0.310 | 36 | 0.297±0.376 | <0.001* |
|      | Guided | 2.967±0.202 |    |             |         |
| P#22 | Free   | 3.273±0.336 | 36 | 0.294±0.406 | <0.001* |
|      | Guided | 2.978±0.208 |    |             |         |
| P#23 | Free   | 4.144±0.643 | 27 | 1.155±0.808 | <0.001* |
|      | Guided | 2.988±0.451 |    |             |         |

|      |        |             |    |              |         |
|------|--------|-------------|----|--------------|---------|
| P#24 | Free   | 4.124±1.811 | 27 | 1.154±1.772  | 0.002*  |
|      | Guided | 2.970±0.178 |    |              |         |
| P#25 | Free   | 5.409±0.566 | 21 | 2.450±0.478  | <0.001* |
|      | Guided | 2.959±0.232 |    |              |         |
| P#26 | Free   | 5.431±0.962 | 21 | 2.452±1.045  | <0.001* |
|      | Guided | 2.979±0.260 |    |              |         |
| P#27 | Free   | 3.509±0.337 | 33 | 0.554±0.459  | <0.001* |
|      | Guided | 2.955±0.462 |    |              |         |
| P#28 | Free   | 5.092±1.133 | 21 | 2.119±1.216  | <0.001* |
|      | Guided | 2.973±0.191 |    |              |         |
| P#29 | Free   | 4.501±0.714 | 25 | 1.533±0.792  | <0.001* |
|      | Guided | 2.967±0.164 |    |              |         |
| P#30 | Free   | 2.826±0.934 | 39 | -0.138±1.079 | 0.430   |
|      | Guided | 2.964±0.404 |    |              |         |
| P#31 | Free   | 3.929±0.261 | 29 | 0.725±0.606  | <0.001* |
|      | Guided | 3.204±0.542 |    |              |         |
| P#32 | Free   | 4.762±0.494 | 24 | 1.795±0.516  | <0.001* |
|      | Guided | 2.967±0.183 |    |              |         |
| P#33 | Free   | 5.474±2.004 | 21 | 2.501±2.013  | <0.001* |
|      | Guided | 2.973±0.213 |    |              |         |
| P#34 | Free   | 6.440±3.133 | 16 | 3.502±3.241  | 0.001*  |
|      | Guided | 2.938±0.217 |    |              |         |
| P#35 | Free   | 2.856±0.876 | 38 | -0.189±1.063 | 0.281   |
|      | Guided | 3.045±0.568 |    |              |         |
| P#36 | Free   | 4.646±0.591 | 25 | 1.680±0.643  | <0.001* |
|      | Guided | 2.966±0.306 |    |              |         |

|      |        |             |    |              |         |
|------|--------|-------------|----|--------------|---------|
| P#37 | Free   | 2.983±0.316 | 39 | 0.271±0.360  | <0.001* |
|      | Guided | 2.712±0.175 |    |              |         |
| P#38 | Free   | 3.351±0.539 | 34 | 0.455±0.673  | <0.001* |
|      | Guided | 2.896±0.286 |    |              |         |
| P#39 | Free   | 2.746±0.375 | 39 | -0.144±0.586 | 0.134   |
|      | Guided | 2.890±0.407 |    |              |         |
| P#40 | Free   | 3.188±0.420 | 36 | 0.083±0.644  | 0.446   |
|      | Guided | 3.105±0.479 |    |              |         |
| P#41 | Free   | 3.202±0.535 | 36 | 0.106±0.639  | 0.328   |
|      | Guided | 3.097±0.380 |    |              |         |
| P#42 | Free   | 3.601±0.319 | 32 | 0.533±0.598  | <0.001* |
|      | Guided | 3.069±0.472 |    |              |         |
| P#43 | Free   | 4.975±0.592 | 23 | 2.021±0.547  | <0.001* |
|      | Guided | 2.954±0.276 |    |              |         |
| P#44 | Free   | 4.719±2.634 | 24 | 1.578±2.744  | 0.010*  |
|      | Guided | 3.141±0.447 |    |              |         |
| P#45 | Free   | 3.259±0.213 | 35 | 0.295±0.241  | <0.001* |
|      | Guided | 2.964±0.161 |    |              |         |
| P#46 | Free   | 4.422       | 26 | 1.446±0.701  | <0.001* |
|      | Guided | 2.976       |    |              |         |
| P#47 | Free   | 3.490       | 33 | 0.529±0.905  | 0.002*  |
|      | Guided | 2.960       |    |              |         |
| P#48 | Free   | 6.317       | 18 | 3.339±3.476  | 0.001*  |
|      | Guided | 2.979       |    |              |         |
| P#49 | Free   | 4.642       | 25 | 1.544±0.789  | <0.001* |
|      | Guided | 3.098       |    |              |         |

|      |        |       |    |             |         |
|------|--------|-------|----|-------------|---------|
| P#50 | Free   | 4.256 | 27 | 1.237±0.939 | <0.001* |
|      | Guided | 3.019 |    |             |         |
| P#51 | Free   | 4.963 | 23 | 1.986±2.225 | <0.001* |
|      | Guided | 2.977 |    |             |         |
| P#52 | Free   | 3.479 | 33 | 0.513±0.677 | <0.001* |
|      | Guided | 2.967 |    |             |         |
